# Supplementary material
Source: publisher figshare collection journal article supplement (https://acs.figshare.com/ndownloader/files/3950518)
Supplement: Supplementary file 1 [file 3950518]

 
data_20130114lt2_0m 
  
_audit_creation_method            SHELXL-97 
_chemical_name_systematic 
; 
 ? 
; 
_chemical_name_common             ? 
_chemical_melting_point           ? 
_chemical_formula_moiety          ? 
_chemical_formula_sum 
 'C18 H26 N O6 P' 
_chemical_formula_weight          383.37 
  
loop_ 
 _atom_type_symbol 
 _atom_type_description 
 _atom_type_scat_dispersion_real 
 _atom_type_scat_dispersion_imag 
 _atom_type_scat_source 
 'C'  'C'   0.0033   0.0016 
 'International Tables Vol C Tables 4.2.6.8 and 6.1.1.4' 
 'H'  'H'   0.0000   0.0000 
 'International Tables Vol C Tables 4.2.6.8 and 6.1.1.4' 
 'N'  'N'   0.0061   0.0033 
 'International Tables Vol C Tables 4.2.6.8 and 6.1.1.4' 
 'O'  'O'   0.0106   0.0060 
 'International Tables Vol C Tables 4.2.6.8 and 6.1.1.4' 
 'P'  'P'   0.1023   0.0942 
 'International Tables Vol C Tables 4.2.6.8 and 6.1.1.4' 
  
_symmetry_cell_setting            Orthorhombic 
_symmetry_space_group_name_H-M    P2(1)2(1)2(1) 
  
loop_ 
 _symmetry_equiv_pos_as_xyz 
 'x, y, z' 
 'x+1/2, -y+1/2, -z' 
 '-x, y+1/2, -z+1/2' 
 '-x+1/2, -y, z+1/2' 
  
_cell_length_a                    9.8635(5) 
_cell_length_b                    9.864 
_cell_length_c                    20.2533(13) 
_cell_angle_alpha                 90.00 
_cell_angle_beta                  90.00 
_cell_angle_gamma                 90.00 
_cell_volume                      1970.42(16) 
_cell_formula_units_Z             4 
_cell_measurement_temperature     100(1) 
_cell_measurement_reflns_used     9988 
_cell_measurement_theta_min       2.30 
_cell_measurement_theta_max       27.40 
  
_exptl_crystal_description        Block 
_exptl_crystal_colour             silver 
_exptl_crystal_size_max           0.12 
_exptl_crystal_size_mid           0.10 
_exptl_crystal_size_min           0.04 
_exptl_crystal_density_meas       none
_exptl_crystal_density_diffrn     1.292 
_exptl_crystal_density_method     'not measured' 
_exptl_crystal_F_000              816 
_exptl_absorpt_coefficient_mu     0.172 
_exptl_absorpt_correction_type    multi-scan
_exptl_absorpt_correction_T_min   0.9796 
_exptl_absorpt_correction_T_max   0.9931 
_exptl_absorpt_process_details    'Bruker SADABS' 
  
_exptl_special_details 
; 
 ? 
; 
  
_diffrn_ambient_temperature       100(1) 
_diffrn_radiation_wavelength      0.71073 
_diffrn_radiation_type            MoK\a 
_diffrn_radiation_source          'fine-focus sealed tube' 
_diffrn_radiation_monochromator   graphite 
_diffrn_measurement_device_type   'Bruker APEX-II CCD' 
_diffrn_measurement_method        '\f and \w scans' 
_diffrn_detector_area_resol_mean  ? 
_diffrn_reflns_number             40491 
_diffrn_reflns_av_R_equivalents   0.0767 
_diffrn_reflns_av_sigmaI/netI     0.0767 
_diffrn_reflns_limit_h_min        -13 
_diffrn_reflns_limit_h_max        13 
_diffrn_reflns_limit_k_min        -13 
_diffrn_reflns_limit_k_max        13 
_diffrn_reflns_limit_l_min        -26 
_diffrn_reflns_limit_l_max        27 
_diffrn_reflns_theta_min          2.01 
_diffrn_reflns_theta_max          28.31 
_reflns_number_total              4275 
_reflns_number_gt                 3470 
_reflns_threshold_expression      >2sigma(I) 
  
_computing_data_collection        'Bruker APEX2' 
_computing_cell_refinement        'Bruker SAINT' 
_computing_data_reduction         'Bruker SAINT' 
_computing_structure_solution     'SHELXS-97 (Sheldrick, 2008)' 
_computing_structure_refinement   'SHELXL-97 (Sheldrick, 2008)' 
_computing_molecular_graphics     'Bruker SHELXTL' 
_computing_publication_material   'Bruker SHELXTL' 
  
_refine_special_details 
; 
 Refinement of F^2^ against ALL reflections.  The weighted R-factor wR and 
 goodness of fit S are based on F^2^, conventional R-factors R are based 
 on F, with F set to zero for negative F^2^. The threshold expression of 
 F^2^ > 2sigma(F^2^) is used only for calculating R-factors(gt) etc. and is 
 not relevant to the choice of reflections for refinement.  R-factors based 
 on F^2^ are statistically about twice as large as those based on F, and R- 
 factors based on ALL data will be even larger. 
; 
  
_refine_ls_structure_factor_coef  Fsqd 
_refine_ls_matrix_type            full 
_refine_ls_weighting_scheme       calc 
_refine_ls_weighting_details 
 'calc w=1/[\s^2^(Fo^2^)+(0.0306P)^2^+0.0000P] where P=(Fo^2^+2Fc^2^)/3' 
_atom_sites_solution_primary      direct 
_atom_sites_solution_secondary    difmap 
_atom_sites_solution_hydrogens    geom 
_refine_ls_hydrogen_treatment     refxyz
_refine_ls_extinction_method      none 
_refine_ls_extinction_coef        ? 
_refine_ls_abs_structure_details 
 'Flack H D (1983), Acta Cryst. A39, 876-881' 
_refine_ls_abs_structure_Flack    0.02(8) 
_refine_ls_number_reflns          4275 
_refine_ls_number_parameters      243 
_refine_ls_number_restraints      0 
_refine_ls_R_factor_all           0.0555 
_refine_ls_R_factor_gt            0.0412 
_refine_ls_wR_factor_ref          0.0809 
_refine_ls_wR_factor_gt           0.0765 
_refine_ls_goodness_of_fit_ref    0.937 
_refine_ls_restrained_S_all       0.937 
_refine_ls_shift/su_max           0.000 
_refine_ls_shift/su_mean          0.000 
  
loop_ 
 _atom_site_label 
 _atom_site_type_symbol 
 _atom_site_fract_x 
 _atom_site_fract_y 
 _atom_site_fract_z 
 _atom_site_U_iso_or_equiv 
 _atom_site_adp_type 
 _atom_site_occupancy 
 _atom_site_symmetry_multiplicity 
 _atom_site_calc_flag 
 _atom_site_refinement_flags 
 _atom_site_disorder_assembly 
 _atom_site_disorder_group 
O1 O 0.67651(14) 0.74926(13) 0.13909(8) 0.0244(3) Uani 1 1 d . . . 
H1A H 0.7534 0.7711 0.1247 0.037 Uiso 1 1 calc R . . 
C2 C 0.67196(19) 0.60830(19) 0.14943(10) 0.0203(4) Uani 1 1 d . . . 
H2A H 0.7007 0.5617 0.1079 0.024 Uiso 1 1 calc R . . 
C3 C 0.5243(2) 0.57014(19) 0.16408(10) 0.0197(4) Uani 1 1 d . . . 
H3A H 0.5207 0.4694 0.1695 0.024 Uiso 1 1 calc R . . 
O4 O 0.48139(13) 0.62903(13) 0.22511(6) 0.0201(3) Uani 1 1 d . . . 
C5 C 0.4194(2) 0.5351(2) 0.26976(10) 0.0249(4) Uani 1 1 d . . . 
H5A H 0.4798 0.4564 0.2769 0.030 Uiso 1 1 calc R . . 
H5B H 0.3327 0.5018 0.2511 0.030 Uiso 1 1 calc R . . 
C6 C 0.3942(2) 0.6065(2) 0.33376(10) 0.0208(4) Uani 1 1 d . . . 
C7 C 0.4952(2) 0.6892(2) 0.36123(12) 0.0285(5) Uani 1 1 d . . . 
H7A H 0.5788 0.7021 0.3388 0.034 Uiso 1 1 calc R . . 
C8 C 0.4715(3) 0.7522(2) 0.42161(12) 0.0431(7) Uani 1 1 d . . . 
H8A H 0.5395 0.8079 0.4408 0.052 Uiso 1 1 calc R . . 
C9 C 0.3489(4) 0.7338(3) 0.45378(14) 0.0547(9) Uani 1 1 d . . . 
H9A H 0.3328 0.7783 0.4946 0.066 Uiso 1 1 calc R . . 
C10 C 0.2503(3) 0.6517(3) 0.42717(14) 0.0483(8) Uani 1 1 d . . . 
H10A H 0.1672 0.6382 0.4500 0.058 Uiso 1 1 calc R . . 
C11 C 0.2726(2) 0.5890(2) 0.36723(12) 0.0304(5) Uani 1 1 d . . . 
H11A H 0.2040 0.5332 0.3487 0.036 Uiso 1 1 calc R . . 
P12 P 0.40854(5) 0.61446(5) 0.09793(3) 0.02027(12) Uani 1 1 d . . . 
O13 O 0.45973(15) 0.57593(13) 0.03232(7) 0.0249(3) Uani 1 1 d . . . 
O14 O 0.36266(15) 0.76516(13) 0.10401(8) 0.0246(3) Uani 1 1 d . . . 
C15 C 0.4150(2) 0.8720(2) 0.06103(11) 0.0264(4) Uani 1 1 d . . . 
H15A H 0.4590 0.8315 0.0217 0.032 Uiso 1 1 calc R . . 
H15B H 0.4832 0.9269 0.0849 0.032 Uiso 1 1 calc R . . 
C16 C 0.3000(3) 0.9583(3) 0.04059(14) 0.0432(7) Uani 1 1 d . . . 
H16A H 0.3329 1.0306 0.0115 0.065 Uiso 1 1 calc R . . 
H16B H 0.2576 0.9984 0.0798 0.065 Uiso 1 1 calc R . . 
H16C H 0.2332 0.9031 0.0169 0.065 Uiso 1 1 calc R . . 
O17 O 0.27925(14) 0.53491(14) 0.12229(8) 0.0267(4) Uani 1 1 d . . . 
C18 C 0.1519(2) 0.5431(2) 0.08611(12) 0.0293(5) Uani 1 1 d . . . 
H18A H 0.1676 0.5278 0.0384 0.035 Uiso 1 1 calc R . . 
H18B H 0.1104 0.6337 0.0919 0.035 Uiso 1 1 calc R . . 
C19 C 0.0599(2) 0.4349(3) 0.11360(13) 0.0426(6) Uani 1 1 d . . . 
H19A H -0.0273 0.4374 0.0904 0.064 Uiso 1 1 calc R . . 
H19B H 0.0452 0.4511 0.1608 0.064 Uiso 1 1 calc R . . 
H19C H 0.1020 0.3458 0.1075 0.064 Uiso 1 1 calc R . . 
C20 C 0.7627(2) 0.5602(2) 0.20565(10) 0.0197(4) Uani 1 1 d . . . 
C21 C 0.7676(2) 0.4235(2) 0.22204(11) 0.0241(4) Uani 1 1 d . . . 
H21A H 0.7142 0.3595 0.1985 0.029 Uiso 1 1 calc R . . 
C22 C 0.8510(2) 0.3816(2) 0.27283(10) 0.0259(4) Uani 1 1 d . . . 
H22A H 0.8515 0.2878 0.2836 0.031 Uiso 1 1 calc R . . 
N23 N 0.93098(18) 0.46367(18) 0.30791(9) 0.0274(4) Uani 1 1 d . . . 
C24 C 0.9249(2) 0.5957(2) 0.29169(11) 0.0291(5) Uani 1 1 d . . . 
H24A H 0.9800 0.6574 0.3157 0.035 Uiso 1 1 calc R . . 
C25 C 0.8435(2) 0.6471(2) 0.24235(11) 0.0259(5) Uani 1 1 d . . . 
H25A H 0.8429 0.7417 0.2335 0.031 Uiso 1 1 calc R . . 
O26 O 0.42780(16) 0.68537(15) -0.09257(9) 0.0246(3) Uani 1 1 d . . . 
H26A H 0.465(3) 0.634(3) -0.1230(17) 0.068(10) Uiso 1 1 d . . . 
H26B H 0.434(3) 0.648(3) -0.0585(15) 0.047(9) Uiso 1 1 d . . . 
  
loop_ 
 _atom_site_aniso_label 
 _atom_site_aniso_U_11 
 _atom_site_aniso_U_22 
 _atom_site_aniso_U_33 
 _atom_site_aniso_U_23 
 _atom_site_aniso_U_13 
 _atom_site_aniso_U_12 
O1 0.0213(8) 0.0199(7) 0.0320(9) 0.0097(6) -0.0005(6) -0.0014(5) 
C2 0.0211(10) 0.0196(9) 0.0202(11) 0.0017(9) 0.0010(8) 0.0007(8) 
C3 0.0233(10) 0.0192(10) 0.0167(10) 0.0002(8) 0.0007(8) -0.0002(8) 
O4 0.0258(7) 0.0188(7) 0.0158(7) 0.0014(6) 0.0038(6) -0.0025(6) 
C5 0.0307(11) 0.0242(10) 0.0197(11) 0.0038(9) 0.0045(9) -0.0053(9) 
C6 0.0268(10) 0.0191(9) 0.0167(10) 0.0043(8) -0.0003(8) 0.0029(8) 
C7 0.0416(14) 0.0202(10) 0.0236(12) 0.0022(10) -0.0053(10) -0.0024(9) 
C8 0.084(2) 0.0195(11) 0.0254(14) 0.0037(10) -0.0131(14) -0.0008(12) 
C9 0.113(3) 0.0292(14) 0.0218(15) 0.0015(12) 0.0112(16) 0.0280(16) 
C10 0.064(2) 0.0426(16) 0.0384(16) 0.0119(13) 0.0249(14) 0.0267(14) 
C11 0.0343(12) 0.0291(12) 0.0278(13) 0.0082(10) 0.0060(10) 0.0061(9) 
P12 0.0205(2) 0.0209(2) 0.0194(3) 0.0012(2) -0.0022(2) 0.0012(2) 
O13 0.0319(8) 0.0257(8) 0.0172(7) -0.0002(6) -0.0023(6) 0.0041(6) 
O14 0.0300(8) 0.0207(7) 0.0231(8) 0.0023(7) 0.0018(6) 0.0051(6) 
C15 0.0284(10) 0.0227(10) 0.0280(12) 0.0018(9) 0.0002(9) -0.0033(10) 
C16 0.0346(14) 0.0454(15) 0.0497(17) 0.0238(13) 0.0002(12) 0.0051(11) 
O17 0.0205(7) 0.0302(8) 0.0295(9) 0.0064(7) -0.0063(6) -0.0021(6) 
C18 0.0213(10) 0.0334(11) 0.0332(14) -0.0004(11) -0.0072(9) 0.0043(9) 
C19 0.0247(13) 0.0641(17) 0.0392(15) 0.0015(13) 0.0013(10) -0.0121(11) 
C20 0.0167(9) 0.0225(10) 0.0200(11) -0.0004(8) 0.0017(8) 0.0026(7) 
C21 0.0255(10) 0.0217(10) 0.0251(12) -0.0001(9) -0.0025(9) 0.0009(8) 
C22 0.0266(10) 0.0243(10) 0.0268(12) 0.0031(10) -0.0001(9) 0.0034(9) 
N23 0.0263(9) 0.0312(10) 0.0246(10) 0.0025(8) -0.0025(8) 0.0023(8) 
C24 0.0312(11) 0.0270(11) 0.0292(12) -0.0018(9) -0.0066(10) 0.0020(9) 
C25 0.0272(10) 0.0216(11) 0.0288(12) 0.0003(9) -0.0027(9) -0.0011(8) 
O26 0.0269(8) 0.0269(7) 0.0199(8) 0.0007(8) 0.0016(7) 0.0029(6) 
  
_geom_special_details 
; 
 All esds (except the esd in the dihedral angle between two l.s. planes) 
 are estimated using the full covariance matrix.  The cell esds are taken 
 into account individually in the estimation of esds in distances, angles 
 and torsion angles; correlations between esds in cell parameters are only 
 used when they are defined by crystal symmetry.  An approximate (isotropic) 
 treatment of cell esds is used for estimating esds involving l.s. planes. 
; 
  
loop_ 
 _geom_bond_atom_site_label_1 
 _geom_bond_atom_site_label_2 
 _geom_bond_distance 
 _geom_bond_site_symmetry_2 
 _geom_bond_publ_flag 
O1 C2 1.407(2) . ? 
O1 H1A 0.8400 . ? 
C2 C20 1.524(3) . ? 
C2 C3 1.534(3) . ? 
C2 H2A 1.0000 . ? 
C3 O4 1.430(2) . ? 
C3 P12 1.813(2) . ? 
C3 H3A 1.0000 . ? 
O4 C5 1.432(2) . ? 
C5 C6 1.496(3) . ? 
C5 H5A 0.9900 . ? 
C5 H5B 0.9900 . ? 
C6 C11 1.388(3) . ? 
C6 C7 1.403(3) . ? 
C7 C8 1.391(3) . ? 
C7 H7A 0.9500 . ? 
C8 C9 1.386(4) . ? 
C8 H8A 0.9500 . ? 
C9 C10 1.375(4) . ? 
C9 H9A 0.9500 . ? 
C10 C11 1.380(4) . ? 
C10 H10A 0.9500 . ? 
C11 H11A 0.9500 . ? 
P12 O13 1.4716(15) . ? 
P12 O14 1.5586(13) . ? 
P12 O17 1.5765(15) . ? 
O14 C15 1.461(2) . ? 
C15 C16 1.478(3) . ? 
C15 H15A 0.9900 . ? 
C15 H15B 0.9900 . ? 
C16 H16A 0.9800 . ? 
C16 H16B 0.9800 . ? 
C16 H16C 0.9800 . ? 
O17 C18 1.457(2) . ? 
C18 C19 1.508(3) . ? 
C18 H18A 0.9900 . ? 
C18 H18B 0.9900 . ? 
C19 H19A 0.9800 . ? 
C19 H19B 0.9800 . ? 
C19 H19C 0.9800 . ? 
C20 C25 1.387(3) . ? 
C20 C21 1.390(3) . ? 
C21 C22 1.380(3) . ? 
C21 H21A 0.9500 . ? 
C22 N23 1.335(3) . ? 
C22 H22A 0.9500 . ? 
N23 C24 1.344(3) . ? 
C24 C25 1.378(3) . ? 
C24 H24A 0.9500 . ? 
C25 H25A 0.9500 . ? 
O26 H26A 0.88(3) . ? 
O26 H26B 0.79(3) . ? 
  
loop_ 
 _geom_angle_atom_site_label_1 
 _geom_angle_atom_site_label_2 
 _geom_angle_atom_site_label_3 
 _geom_angle 
 _geom_angle_site_symmetry_1 
 _geom_angle_site_symmetry_3 
 _geom_angle_publ_flag 
C2 O1 H1A 109.5 . . ? 
O1 C2 C20 113.59(16) . . ? 
O1 C2 C3 107.56(14) . . ? 
C20 C2 C3 109.68(16) . . ? 
O1 C2 H2A 108.6 . . ? 
C20 C2 H2A 108.6 . . ? 
C3 C2 H2A 108.6 . . ? 
O4 C3 C2 110.39(16) . . ? 
O4 C3 P12 110.76(13) . . ? 
C2 C3 P12 113.32(14) . . ? 
O4 C3 H3A 107.4 . . ? 
C2 C3 H3A 107.4 . . ? 
P12 C3 H3A 107.4 . . ? 
C3 O4 C5 114.18(14) . . ? 
O4 C5 C6 108.30(15) . . ? 
O4 C5 H5A 110.0 . . ? 
C6 C5 H5A 110.0 . . ? 
O4 C5 H5B 110.0 . . ? 
C6 C5 H5B 110.0 . . ? 
H5A C5 H5B 108.4 . . ? 
C11 C6 C7 119.5(2) . . ? 
C11 C6 C5 120.6(2) . . ? 
C7 C6 C5 119.96(19) . . ? 
C8 C7 C6 119.3(2) . . ? 
C8 C7 H7A 120.3 . . ? 
C6 C7 H7A 120.3 . . ? 
C9 C8 C7 120.1(3) . . ? 
C9 C8 H8A 120.0 . . ? 
C7 C8 H8A 120.0 . . ? 
C10 C9 C8 120.7(3) . . ? 
C10 C9 H9A 119.7 . . ? 
C8 C9 H9A 119.7 . . ? 
C9 C10 C11 119.7(3) . . ? 
C9 C10 H10A 120.1 . . ? 
C11 C10 H10A 120.1 . . ? 
C10 C11 C6 120.8(2) . . ? 
C10 C11 H11A 119.6 . . ? 
C6 C11 H11A 119.6 . . ? 
O13 P12 O14 114.66(8) . . ? 
O13 P12 O17 115.57(9) . . ? 
O14 P12 O17 102.42(8) . . ? 
O13 P12 C3 112.88(9) . . ? 
O14 P12 C3 110.75(9) . . ? 
O17 P12 C3 99.09(9) . . ? 
C15 O14 P12 122.54(13) . . ? 
O14 C15 C16 108.09(18) . . ? 
O14 C15 H15A 110.1 . . ? 
C16 C15 H15A 110.1 . . ? 
O14 C15 H15B 110.1 . . ? 
C16 C15 H15B 110.1 . . ? 
H15A C15 H15B 108.4 . . ? 
C15 C16 H16A 109.5 . . ? 
C15 C16 H16B 109.5 . . ? 
H16A C16 H16B 109.5 . . ? 
C15 C16 H16C 109.5 . . ? 
H16A C16 H16C 109.5 . . ? 
H16B C16 H16C 109.5 . . ? 
C18 O17 P12 120.84(13) . . ? 
O17 C18 C19 107.10(18) . . ? 
O17 C18 H18A 110.3 . . ? 
C19 C18 H18A 110.3 . . ? 
O17 C18 H18B 110.3 . . ? 
C19 C18 H18B 110.3 . . ? 
H18A C18 H18B 108.6 . . ? 
C18 C19 H19A 109.5 . . ? 
C18 C19 H19B 109.5 . . ? 
H19A C19 H19B 109.5 . . ? 
C18 C19 H19C 109.5 . . ? 
H19A C19 H19C 109.5 . . ? 
H19B C19 H19C 109.5 . . ? 
C25 C20 C21 116.84(19) . . ? 
C25 C20 C2 123.08(18) . . ? 
C21 C20 C2 120.09(18) . . ? 
C22 C21 C20 119.32(19) . . ? 
C22 C21 H21A 120.3 . . ? 
C20 C21 H21A 120.3 . . ? 
N23 C22 C21 124.53(19) . . ? 
N23 C22 H22A 117.7 . . ? 
C21 C22 H22A 117.7 . . ? 
C22 N23 C24 115.53(18) . . ? 
N23 C24 C25 124.0(2) . . ? 
N23 C24 H24A 118.0 . . ? 
C25 C24 H24A 118.0 . . ? 
C24 C25 C20 119.73(19) . . ? 
C24 C25 H25A 120.1 . . ? 
C20 C25 H25A 120.1 . . ? 
H26A O26 H26B 108(3) . . ? 
  
loop_ 
 _geom_torsion_atom_site_label_1 
 _geom_torsion_atom_site_label_2 
 _geom_torsion_atom_site_label_3 
 _geom_torsion_atom_site_label_4 
 _geom_torsion 
 _geom_torsion_site_symmetry_1 
 _geom_torsion_site_symmetry_2 
 _geom_torsion_site_symmetry_3 
 _geom_torsion_site_symmetry_4 
 _geom_torsion_publ_flag 
O1 C2 C3 O4 -65.64(19) . . . . ? 
C20 C2 C3 O4 58.34(19) . . . . ? 
O1 C2 C3 P12 59.26(19) . . . . ? 
C20 C2 C3 P12 -176.76(13) . . . . ? 
C2 C3 O4 C5 -129.51(16) . . . . ? 
P12 C3 O4 C5 104.15(16) . . . . ? 
C3 O4 C5 C6 173.72(15) . . . . ? 
O4 C5 C6 C11 137.03(19) . . . . ? 
O4 C5 C6 C7 -44.6(3) . . . . ? 
C11 C6 C7 C8 0.0(3) . . . . ? 
C5 C6 C7 C8 -178.39(19) . . . . ? 
C6 C7 C8 C9 -0.5(3) . . . . ? 
C7 C8 C9 C10 1.1(4) . . . . ? 
C8 C9 C10 C11 -1.2(4) . . . . ? 
C9 C10 C11 C6 0.8(3) . . . . ? 
C7 C6 C11 C10 -0.2(3) . . . . ? 
C5 C6 C11 C10 178.24(19) . . . . ? 
O4 C3 P12 O13 170.37(12) . . . . ? 
C2 C3 P12 O13 45.67(16) . . . . ? 
O4 C3 P12 O14 40.26(16) . . . . ? 
C2 C3 P12 O14 -84.44(15) . . . . ? 
O4 C3 P12 O17 -66.81(14) . . . . ? 
C2 C3 P12 O17 168.49(13) . . . . ? 
O13 P12 O14 C15 -24.41(18) . . . . ? 
O17 P12 O14 C15 -150.39(14) . . . . ? 
C3 P12 O14 C15 104.75(16) . . . . ? 
P12 O14 C15 C16 136.69(18) . . . . ? 
O13 P12 O17 C18 -61.86(17) . . . . ? 
O14 P12 O17 C18 63.52(17) . . . . ? 
C3 P12 O17 C18 177.26(16) . . . . ? 
P12 O17 C18 C19 168.47(16) . . . . ? 
O1 C2 C20 C25 -1.0(3) . . . . ? 
C3 C2 C20 C25 -121.4(2) . . . . ? 
O1 C2 C20 C21 179.37(17) . . . . ? 
C3 C2 C20 C21 59.0(2) . . . . ? 
C25 C20 C21 C22 -0.1(3) . . . . ? 
C2 C20 C21 C22 179.59(19) . . . . ? 
C20 C21 C22 N23 -1.0(3) . . . . ? 
C21 C22 N23 C24 1.2(3) . . . . ? 
C22 N23 C24 C25 -0.3(3) . . . . ? 
N23 C24 C25 C20 -0.7(4) . . . . ? 
C21 C20 C25 C24 0.9(3) . . . . ? 
C2 C20 C25 C24 -178.8(2) . . . . ? 
  
loop_ 
 _geom_hbond_atom_site_label_D 
 _geom_hbond_atom_site_label_H 
 _geom_hbond_atom_site_label_A 
 _geom_hbond_distance_DH 
 _geom_hbond_distance_HA 
 _geom_hbond_distance_DA 
 _geom_hbond_angle_DHA 
 _geom_hbond_site_symmetry_A 
O1 H1A O26  0.84 1.89 2.729(2) 178.3 2_565 
O26 H26A N23  0.88(3) 1.98(3) 2.857(2) 172(3) 4_664 
O26 H26B O13  0.79(3) 1.99(3) 2.768(2) 172(3) . 
  
_diffrn_measured_fraction_theta_max    0.865 
_diffrn_reflns_theta_full              28.31 
_diffrn_measured_fraction_theta_full   0.865 
_refine_diff_density_max    0.211 
_refine_diff_density_min   -0.322 
_refine_diff_density_rms    0.051 
